# Supplementary material
Source: ML conference proceedings conference paper supplement (https://openaccess.thecvf.com/content/ICCV2025/html/Teng_FVGen_Accelerating_Novel-View_ICCV_2025_paper.html)
Supplement: Supplementary file 1 [file Teng_FVGen_Accelerating_Novel-View_ICCV_2025_supplemental.pdf]

# FVGen: Accelerating Novel-View Synthesis with Adversarial Video Diffusion Distillation

## Supplementary Material

In this supplementary material, we mainly present the mathematical proof of Equation (8) in our main paper.

Starting from Equation (6):

$$\mathbf{D}_{\text{Soften-RKL}}(p_{\text{fake},t} \| p_{\text{real},t}) = \mathbf{D}_{KL} \left( \frac{1}{2} p_{\text{real},t} + \frac{1}{2} p_{\text{fake},t} \middle\| p_{\text{real},t} \right).$$

For notation simplicity purpose, we define  $p_t(\mathbf{x}) := p_{\text{real},t}$  and  $q_t(\mathbf{x}) := p_{\text{fake},t}$ ; here  $\mathbf{x} = F(G_\theta(z), t)$  defined in the main paper. Then, we have:

$$\begin{aligned} \mathbf{D}_{\text{Soften-RKL}}(p_t(\mathbf{x}) \| q_t(\mathbf{x})) &= \mathbf{D}_{KL} \left( \frac{1}{2} p_t(\mathbf{x}) + \frac{1}{2} q_t(\mathbf{x}) \middle\| p_t(\mathbf{x}) \right) \\ &= \int q_t(\mathbf{x}) \left( \frac{p_t(\mathbf{x})}{q_t(\mathbf{x})} + 1 \right) \log \left( \frac{1}{2} + \frac{q_t(\mathbf{x})}{2p_t(\mathbf{x})} \right) d\mathbf{x}. \end{aligned}$$

Taking derivative w.r.t to model parameter  $\theta$ , we have the soften reverse KL divergence loss:

$$\begin{aligned} \nabla_\theta \mathcal{L}_{\text{DMD}}^{\text{Soften-RKL}} &= \nabla_\theta \int q_t(\mathbf{x}) \left( \frac{p_t(\mathbf{x})}{q_t(\mathbf{x})} + 1 \right) \log \left( \frac{1}{2} + \frac{q_t(\mathbf{x})}{2p_t(\mathbf{x})} \right) d\mathbf{x} \\ &= \int \nabla_\theta \left[ q_t(\mathbf{x}) \left( \frac{p_t(\mathbf{x})}{q_t(\mathbf{x})} + 1 \right) \log \left( \frac{1}{2} + \frac{q_t(\mathbf{x})}{2p_t(\mathbf{x})} \right) \right] d\mathbf{x} \\ &= \underbrace{\int \nabla_\theta q_t(\mathbf{x}) \left[ \left( \frac{p_t(\mathbf{x})}{q_t(\mathbf{x})} + 1 \right) \log \left( \frac{1}{2} + \frac{q_t(\mathbf{x})}{2p_t(\mathbf{x})} \right) \right] d\mathbf{x}}_A \\ &\quad + \underbrace{\int q_t(\mathbf{x}) \nabla_\theta \left[ \left( \frac{p_t(\mathbf{x})}{q_t(\mathbf{x})} + 1 \right) \log \left( \frac{1}{2} + \frac{q_t(\mathbf{x})}{2p_t(\mathbf{x})} \right) \right] d\mathbf{x}}_B. \end{aligned}$$

As  $p_t(\mathbf{x})$  is the real distribution, which is constant w.r.t  $\theta$ . According to the chain rule, we have:

$$\begin{aligned} B &= \int q_t(\mathbf{x}) \left[ -\frac{p_t(\mathbf{x})}{q_t^2(\mathbf{x})} \log \left( \frac{1}{2} + \frac{q_t(\mathbf{x})}{2p_t(\mathbf{x})} \right) \right. \\ &\quad \left. + \left( \frac{p_t(\mathbf{x})}{q_t(\mathbf{x})} + 1 \right) \frac{1}{p_t(\mathbf{x}) + q_t(\mathbf{x})} \right] \nabla_\theta q_t(\mathbf{x}) d\mathbf{x} \\ &= \int \nabla_\theta q_t(\mathbf{x}) \left[ -\frac{p_t(\mathbf{x})}{q_t(\mathbf{x})} \log \left( \frac{1}{2} + \frac{q_t(\mathbf{x})}{2p_t(\mathbf{x})} \right) + 1 \right] d\mathbf{x}. \end{aligned}$$

Define  $r_t(\mathbf{x}) = p_t(\mathbf{x})/q_t(\mathbf{x})$ . Combining the derived  $B$  and previous  $A$ , we have:

$$\begin{aligned} \nabla_\theta \mathcal{L}_{\text{DMD}}^{\text{Soften-RKL}} &= \int \nabla_\theta q_t(\mathbf{x}) \left[ \log \left( \frac{1}{2} + \frac{1}{2r_t(\mathbf{x})} \right) + 1 \right] d\mathbf{x} \\ &= \int q_t(\mathbf{x}) \frac{2r_t(\mathbf{x})}{r_t(\mathbf{x}) + 1} \left( -\frac{1}{2r_t^2(\mathbf{x})} \right) \frac{\partial r_t(\mathbf{x})}{\partial \mathbf{x}} \frac{\partial G_\theta(z)}{\partial \theta} d\mathbf{x} \\ &= - \int q_t(\mathbf{x}) \frac{1}{r_t(\mathbf{x})(r_t(\mathbf{x}) + 1)} \frac{\partial r_t(\mathbf{x})}{\partial \mathbf{x}} \frac{\partial G_\theta(z)}{\partial \theta} d\mathbf{x}. \end{aligned}$$

According to log-derivative trick, we have:

$$\begin{aligned} \frac{\partial r_t(\mathbf{x})}{\partial \mathbf{x}} &= \frac{\frac{\partial p_t(\mathbf{x})}{\partial \mathbf{x}} q_t(\mathbf{x}) - \frac{\partial q_t(\mathbf{x})}{\partial \mathbf{x}} p_t(\mathbf{x})}{(q_t(\mathbf{x}))^2} \\ &= \frac{\frac{\nabla_{\mathbf{x}} p_t(\mathbf{x})}{p_t(\mathbf{x})} - \frac{\nabla_{\mathbf{x}} q_t(\mathbf{x})}{q_t(\mathbf{x})}}{\frac{q_t(\mathbf{x})}{p_t(\mathbf{x})}} \\ &= r_t(\mathbf{x}) (\nabla_{\mathbf{x}} \log p_t(\mathbf{x}) - \nabla_{\mathbf{x}} \log q_t(\mathbf{x})) \\ &= r_t(\mathbf{x}) [s_{\text{real},t}(\mathbf{x}) - s_{\text{fake},t}(\mathbf{x})]. \end{aligned}$$

Therefore:

$$\begin{aligned} \nabla_\theta \mathcal{L}_{\text{DMD}}^{\text{Soften-RKL}} &= - \int q_t(\mathbf{x}) \frac{1}{r_t(\mathbf{x}) + 1} [s_{\text{real},t}(\mathbf{x}) - s_{\text{fake},t}(\mathbf{x})] \frac{\partial G_\theta(z)}{\partial \theta} d\mathbf{x} \\ &= -\mathbb{E} \left[ \frac{1}{r_t(\mathbf{x}) + 1} (s_{\text{real},t}(\mathbf{x}) - s_{\text{fake},t}(\mathbf{x})) \frac{\partial G_\theta(z)}{\partial \theta} \right] \end{aligned}$$

This concludes the proof of Equation (8) in the main paper.
